# Supplementary material for: Gut microbiota modulation and effects of a diet enriched in apple pomace on inflammation in a DSS-induced colitis mouse model
Source: Royal Society of Chemistry journal article supplement (doi:10.1039/d3fo04277d), 2024-01-01

**Gut microbiota modulation and effects on inflammation of a diet enriched in apple pomace in a DSS-induced colitis model in mice**

Ines Calvete-Torre<sup>1,2</sup>, Carlos Sabater<sup>1,2</sup>, Begoña Cantabrana-Plaza<sup>3,4,5</sup>, Abelardo Margolles<sup>1,2</sup>, Manuel Sánchez<sup>3,4,5</sup>, Lorena Ruiz<sup>1,2\*</sup>

<sup>1</sup> Department of Microbiology and Biochemistry of Dairy Products, Instituto de Productos Lácteos de Asturias-Consejo Superior de Investigaciones Científicas (IPLA-CSIC), Paseo Río Linares s/n, 33300, Villaviciosa, Asturias, Spain.

<sup>2</sup> Functionality and Ecology of Beneficial Microbes (MicroHealth) Group, Instituto de Investigación Sanitaria del Principado de Asturias (ISPA), Oviedo, Asturias, Spain.

<sup>3</sup> Farmacología, Departamento de Medicina, Universidad de Oviedo, Oviedo, Spain

<sup>4</sup> Instituto Universitario de Oncología del Principado de Asturias (IUOPA), Oviedo, Spain.

<sup>5</sup> Pharmacology of therapeutic targets Group, Instituto de Investigación Sanitaria del Principado de Asturias (ISPA), Oviedo, Asturias, Spain.

Keywords: DSS, apple pomace, microbiota, colitis

Running title: apple pomace modulates microbiota and attenuates severity of a DSS-induced colitis model

\*Corresponding author: email: [lorena.ruiz@ipla.csic.es](mailto:lorena.ruiz@ipla.csic.es); phone: +34 985 89 21 31

**Supplementary Table S1.** General physicochemical characterization of the apple pomace used for inclusion in AP-diet (g/100g DM). Abbreviations used: DW (Dry weight), TDF (Total dietary fibre), IDF (insoluble dietary fibre), SDF (soluble dietary fibre) and TPC (total phenolic content). Average of three replicates  $\pm$  SD. Methodology employed for the characterization and additional compositional information data were reported in Calvete-Torre et al., 2021<sup>16</sup>.

| <b>Parameter</b>                                             | <b>Perico variety</b> |
|--------------------------------------------------------------|-----------------------|
| <b>Total Carb. (g/100g DW)</b>                               | 82.8 $\pm$ 24.2       |
| <b>%TDF</b>                                                  | 48.9 $\pm$ 4.3        |
| <b>%IDF</b>                                                  | 39.5 $\pm$ 0.9        |
| <b>%SDF</b>                                                  | 9.4 $\pm$ 1.2         |
| <b>Reducing Carb. (g/100g DW)</b>                            | 41.9 $\pm$ 1.1        |
| <b>Protein (%)</b>                                           | 3.1 $\pm$ 0.51        |
| <b>Fat (%)</b>                                               | 2.4 $\pm$ 0.4         |
| <b>Carbohydrates of low molecular weight (water-soluble)</b> |                       |
| <b>Malic acid (mg/g DW)</b>                                  | 1.1 $\pm$ 0.1         |
| <b>Fructose (mg/g DW)</b>                                    | 126.1 $\pm$ 1.3       |
| <b>Glucose (mg/g DW)</b>                                     | 44.3 $\pm$ 1.4        |
| <b>Sucrose (mg/g DW)</b>                                     | 27.2 $\pm$ 0.3        |
| <b>TPC (g/kg DW)</b>                                         | 6.5 $\pm$ 0.6         |
| <b>% Inhibitory Activity of DPPH</b>                         | 40.9 $\pm$ 0.5        |
| <b>Galacturonic acid (%)</b>                                 | 20.9 $\pm$ 0.9        |
| <b>Neutral sugars (%)</b>                                    | 20.1                  |

**Supplementary Table S2.** Composition of the control and AP-diet used for the animal experimentation. Diets were provided by ENVIGO in pelleted form.

|                                | <b>Control diet</b> | <b>AP-diet</b> |
|--------------------------------|---------------------|----------------|
| <b>Nutritional additives</b>   |                     |                |
| <b>Vitamin A (I.U.)</b>        | 6000                | 6000           |
| <b>Vitamin D3 (I.U.)</b>       | 600                 | 600            |
| <b>Fe (mg)</b>                 | 50                  | 50             |
| <b>Mn (mg)</b>                 | 44                  | 44             |
| <b>Zn (mg)</b>                 | 31                  | 31             |
| <b>Cu (mg)</b>                 | 7                   | 7              |
| <b>I (mg)</b>                  | 6.2                 | 6.2            |
| <b>Technological additives</b> |                     |                |
| <b>Sepiolite (mg)</b>          | 632                 | 632            |
| <b>Analytical constituents</b> |                     |                |
| <b>Crude protein (%)</b>       | 14.50               | 14.30          |
| <b>Crude oils and fats (%)</b> | 4.00                | 4.40           |
| <b>Crude fibres (%)</b>        | 4.50                | 4.00           |
| <b>Crude ash (%)</b>           | 4.70                | 4.50           |

**Supplementary Table S3.** Disease activity index (DAI) scoring system used to evaluate the DSS-induced colitis. DAI index was calculated as total score (body weight decrease + stool consistency + bloody stools) divided by 3.

| Score | Weight loss    | Blood in feces | Feces consistency |
|-------|----------------|----------------|-------------------|
| 0     | No weight loss | No blood       | Normal            |
| 1     | < 5 %          |                |                   |
| 2     | < 10 %         |                | Loose stools      |
| 3     | < 20 %         |                |                   |
| 4     | ≥ 20 %         | Blood in feces | Diarrhea          |

**Supplementary Figure S1.** Comparison of different alpha-diversity indicators (Chao1, Shannon, Simpson and Inverse Simpson) of colonic content samples of mice following control and pomace-enriched diets. These samples correspond to healthy and DSS-induced colitis groups.

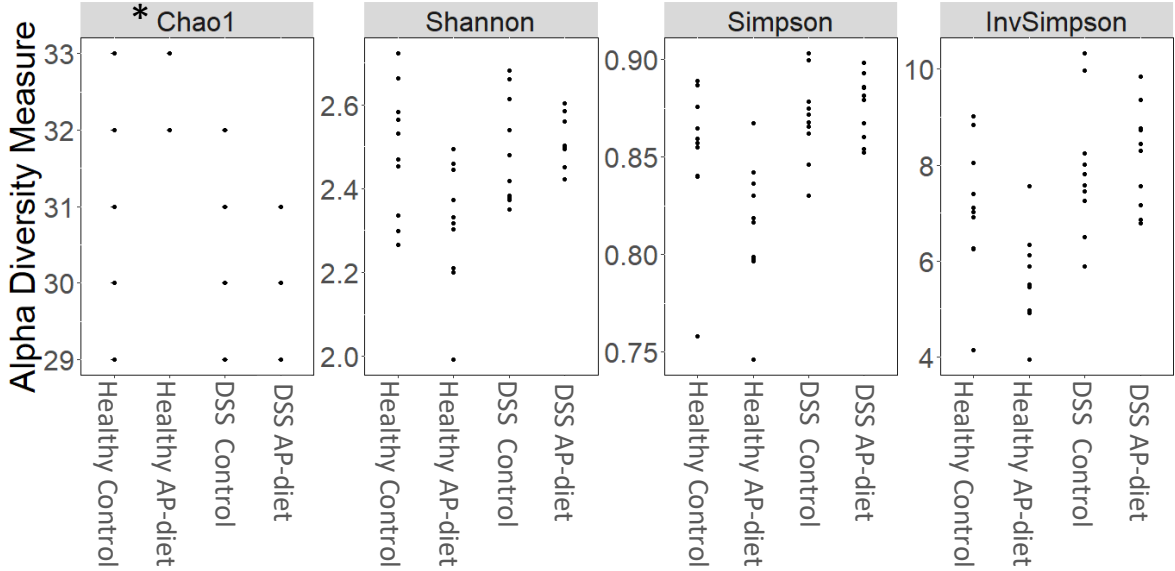

\*Several samples from each group showed the same Chao1 values, corresponding to fully overlapped points in the Figure.

**Supplementary Figure S2.** Beta-diversity (A) and cluster (B) analysis of colonic content samples of mice following control and apple pomace-enriched diets. These samples correspond to healthy and DSS-induced colitis groups. Bray-Curtis dissimilarity method was selected for the calculation

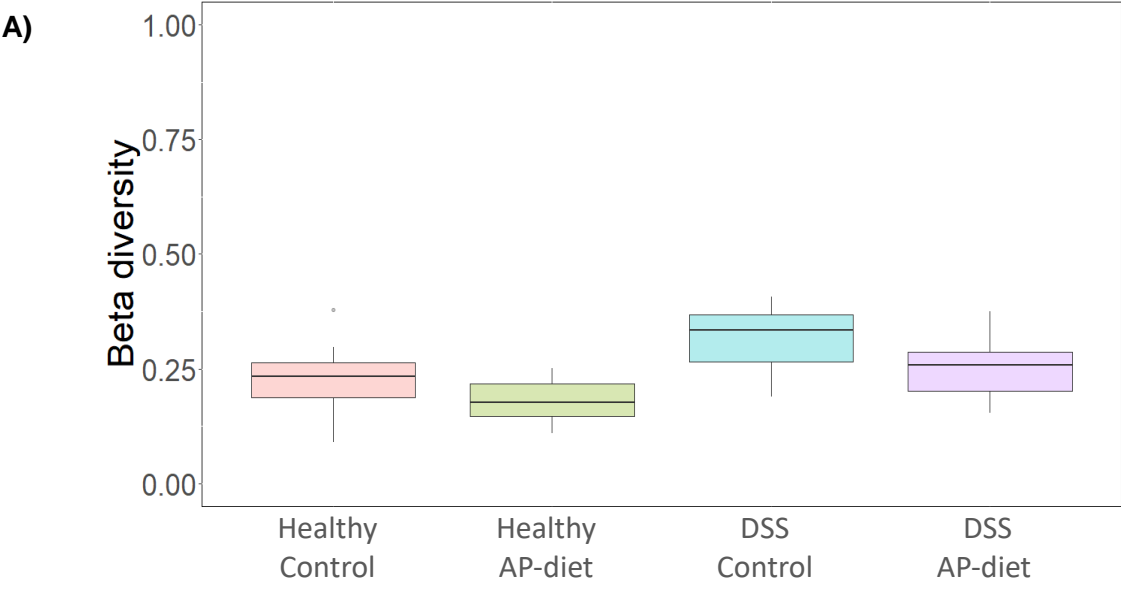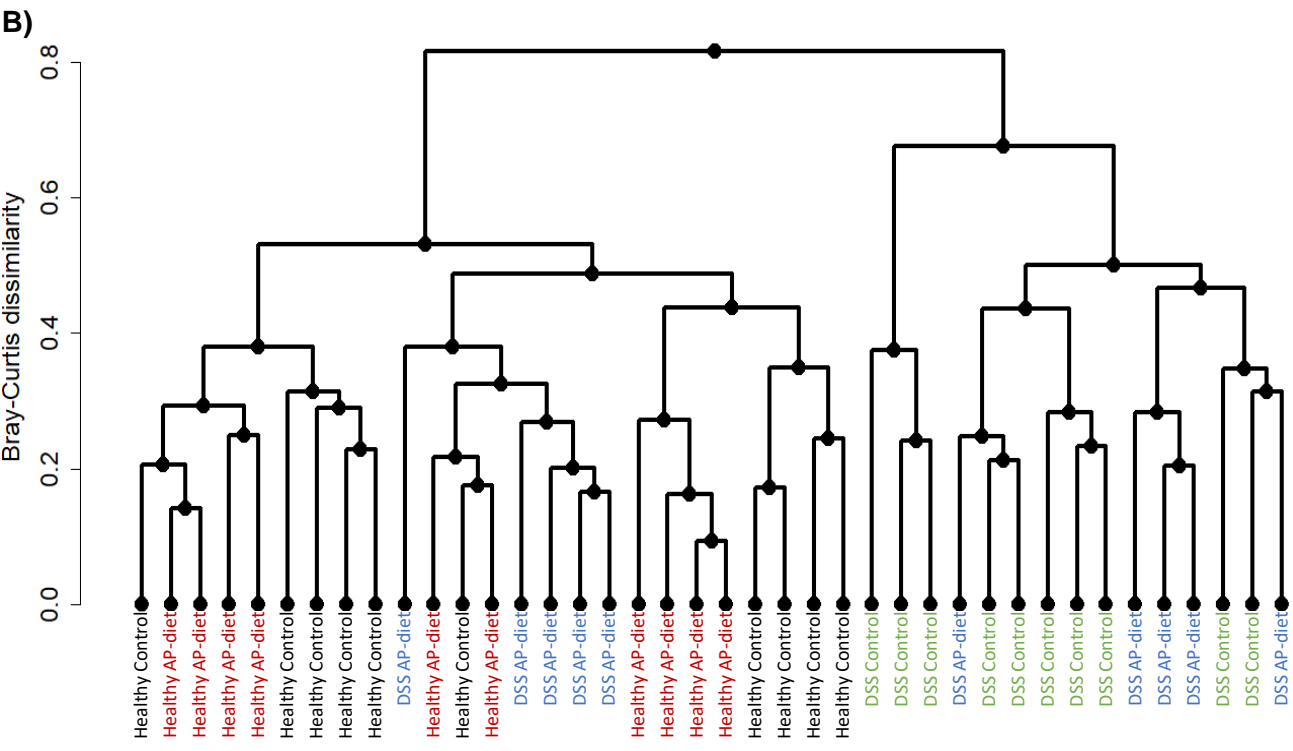

**Supplementary Figure S3.** Linear Discriminant Analysis (LDA) scores of differentially abundant microbial genera among fecal samples of mice following control (n=20 animals) (A) and pomace-enriched (n=20 animals) (B) diets after 0 and 15 days (D0 and D15) of intervention. Both control diets and diets enriched in apple pomace led to an increase in *Bifidobacterium*, *Muribaculum*, *Enterorhabdus*, *Erysipelatoclostridium* and a reduction in *Lactobacillus*. Linear Discriminant Analysis (LDA) scores of differentially abundant microbial genera among fecal samples of mice following control and pomace-enriched diets after 24 days of intervention. These samples correspond to healthy (A) and DSS-induced colitis (B) groups. Therefore, a total 4 groups (n=10 animals per group) are compared. With regard to the healthy group, diets enriched in apple pomace resulted in higher abundances of *Blautia*, *Alloprevotella* and *Muribaculaceae* compared to those obtained in control diets after 24 days of intervention. On the contrary, in DSS group, diets enriched in apple pomace led to higher abundances of *Alistipes*, *Parabacteroides* and *Oscillibacter* compared to control diets.

**A) Control diet adaptation: 0 days vs 15 days**

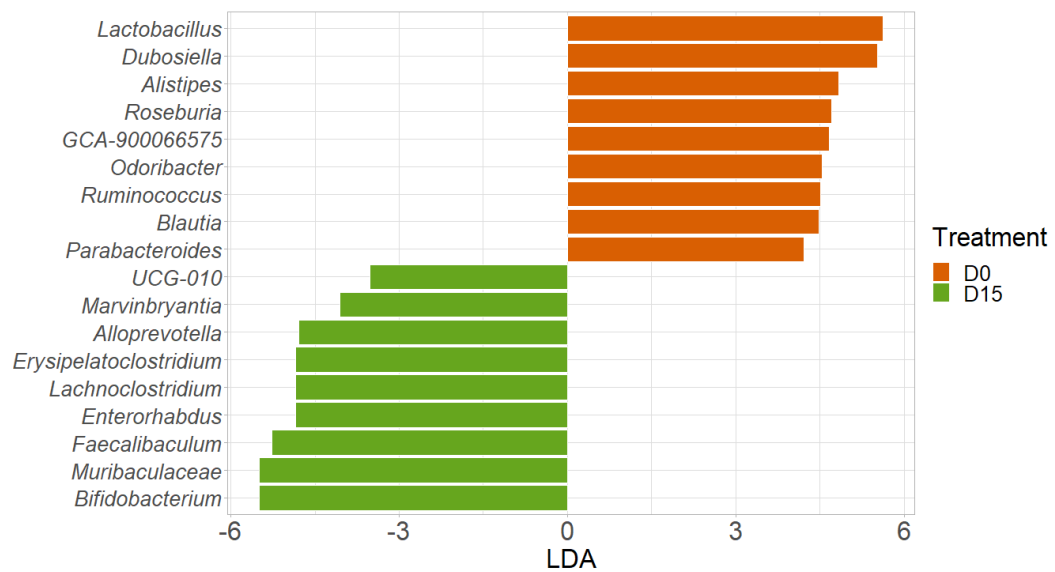

**B) AP-diet adaptation: 0 days vs 15 days**

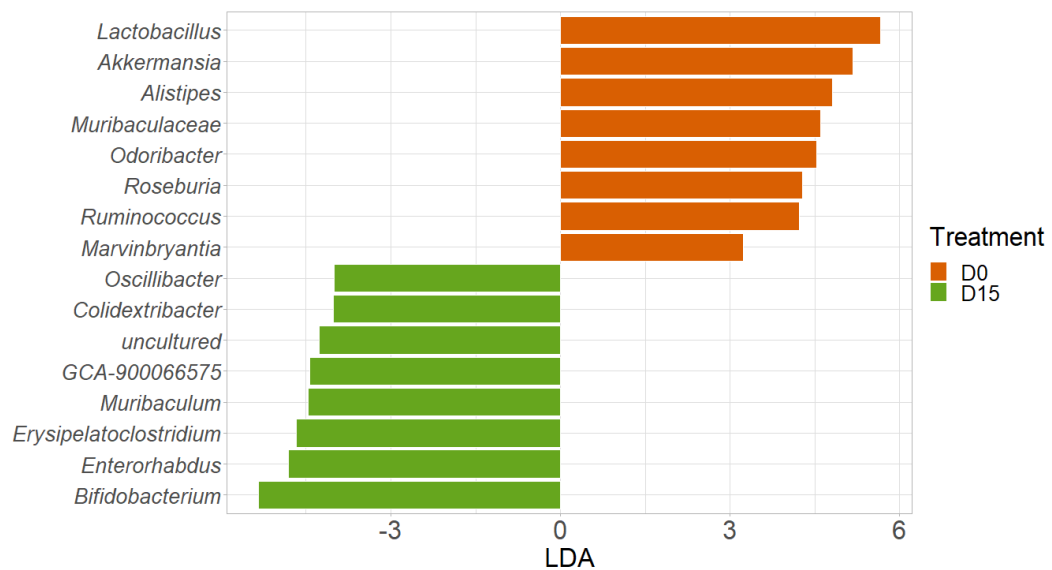

Supplementary Figure S3 cont.

C) Time 24 days – Healthy group: control diet vs pomace-enriched diet

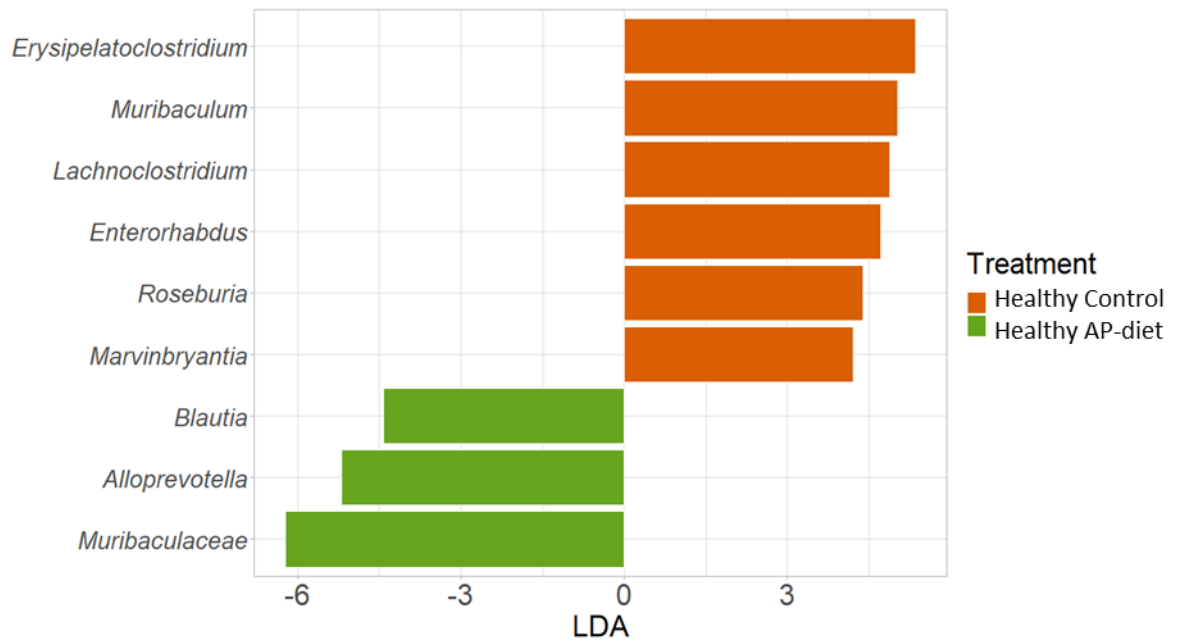

D) Time 24 days – DSS group: control diet vs pomace-enriched diet

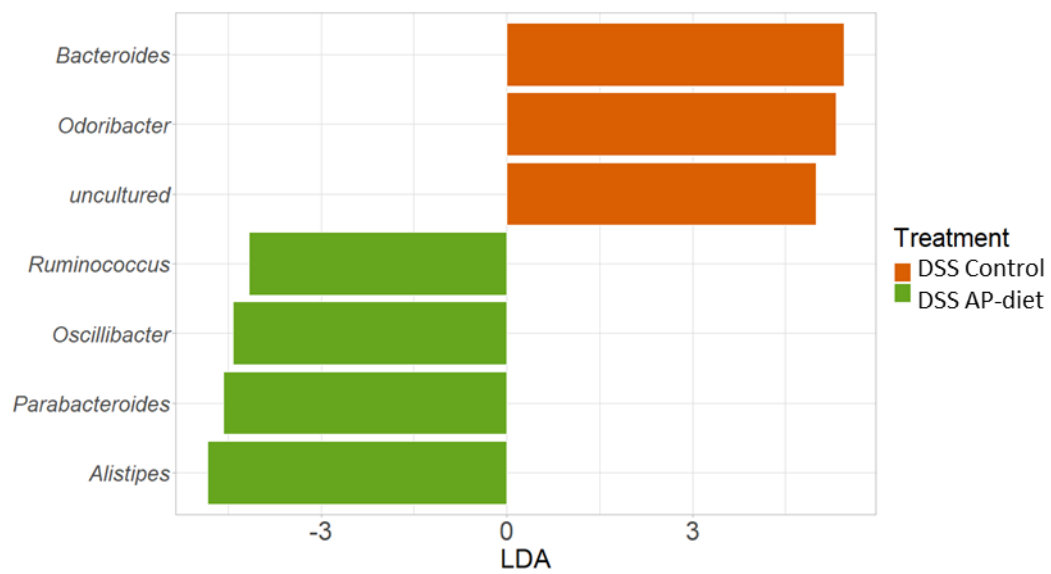



**Supplementary Figure S4.** Major short chain fatty acids (SCFAs) determined in colonic contents of the animals collected from the four groups of animals at the end of the experiment (sacrifice point). Animal groups: Control diet, no DSS; AP-diet (Bagasse), no DSS; Control diet, 2.5% DSS; AP-diet (Bagasse), 2.5% DSS (n=10 mice per group). Diet did not significantly affect the level of the major SCFAs.

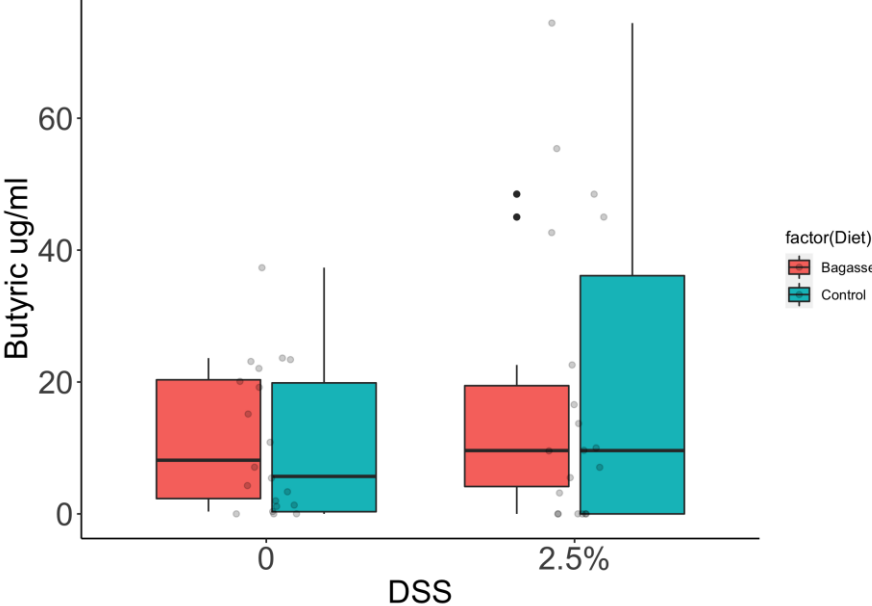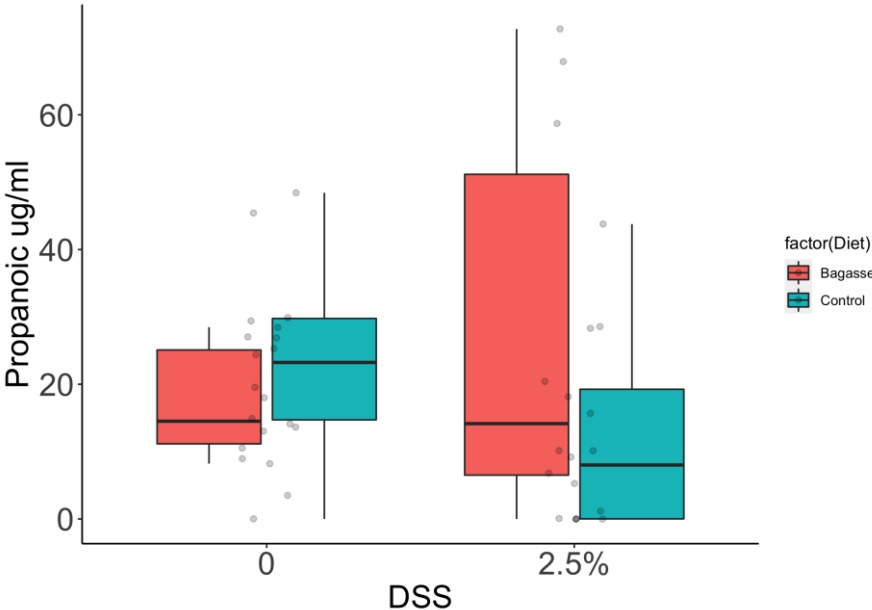

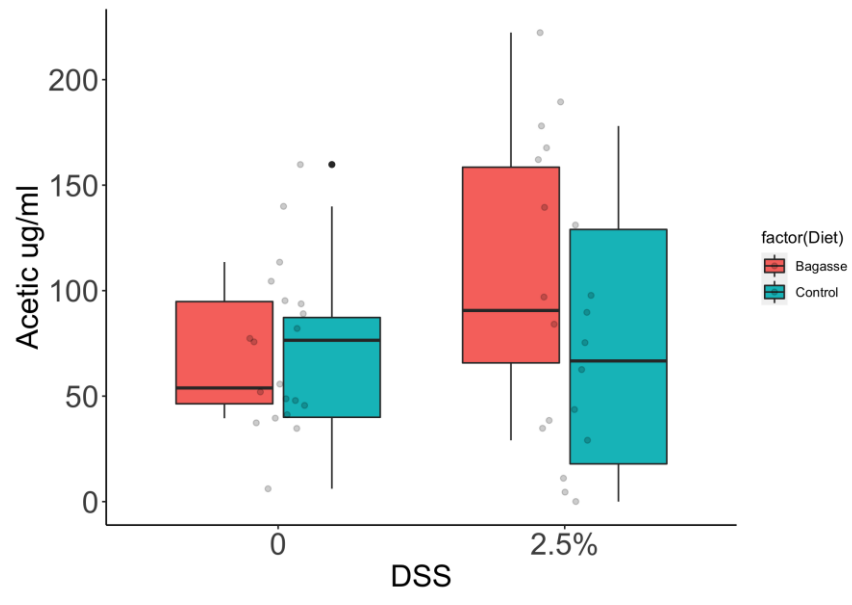

Supplement: d3fo04277d1.pdf [file d3fo04277d1.pdf]
